# Supplementary material for: Dendrite intercalation between epidermal cells tunes nociceptor sensitivity to mechanical stimuli in Drosophila larvae
Source: PubMed Central journal article supplement — bioRxiv. 2023 Sep 15:2023.09.14.557275. Preprint. [Version 1] doi: 10.1101/2023.09.14.557275 (PMC10515945; doi:10.1101/2023.09.14.557275), 2023-09-15
Supplement: media-1.pdf [file media-1.pdf]

Luedke et al, Figure 1 - figure supplement 1

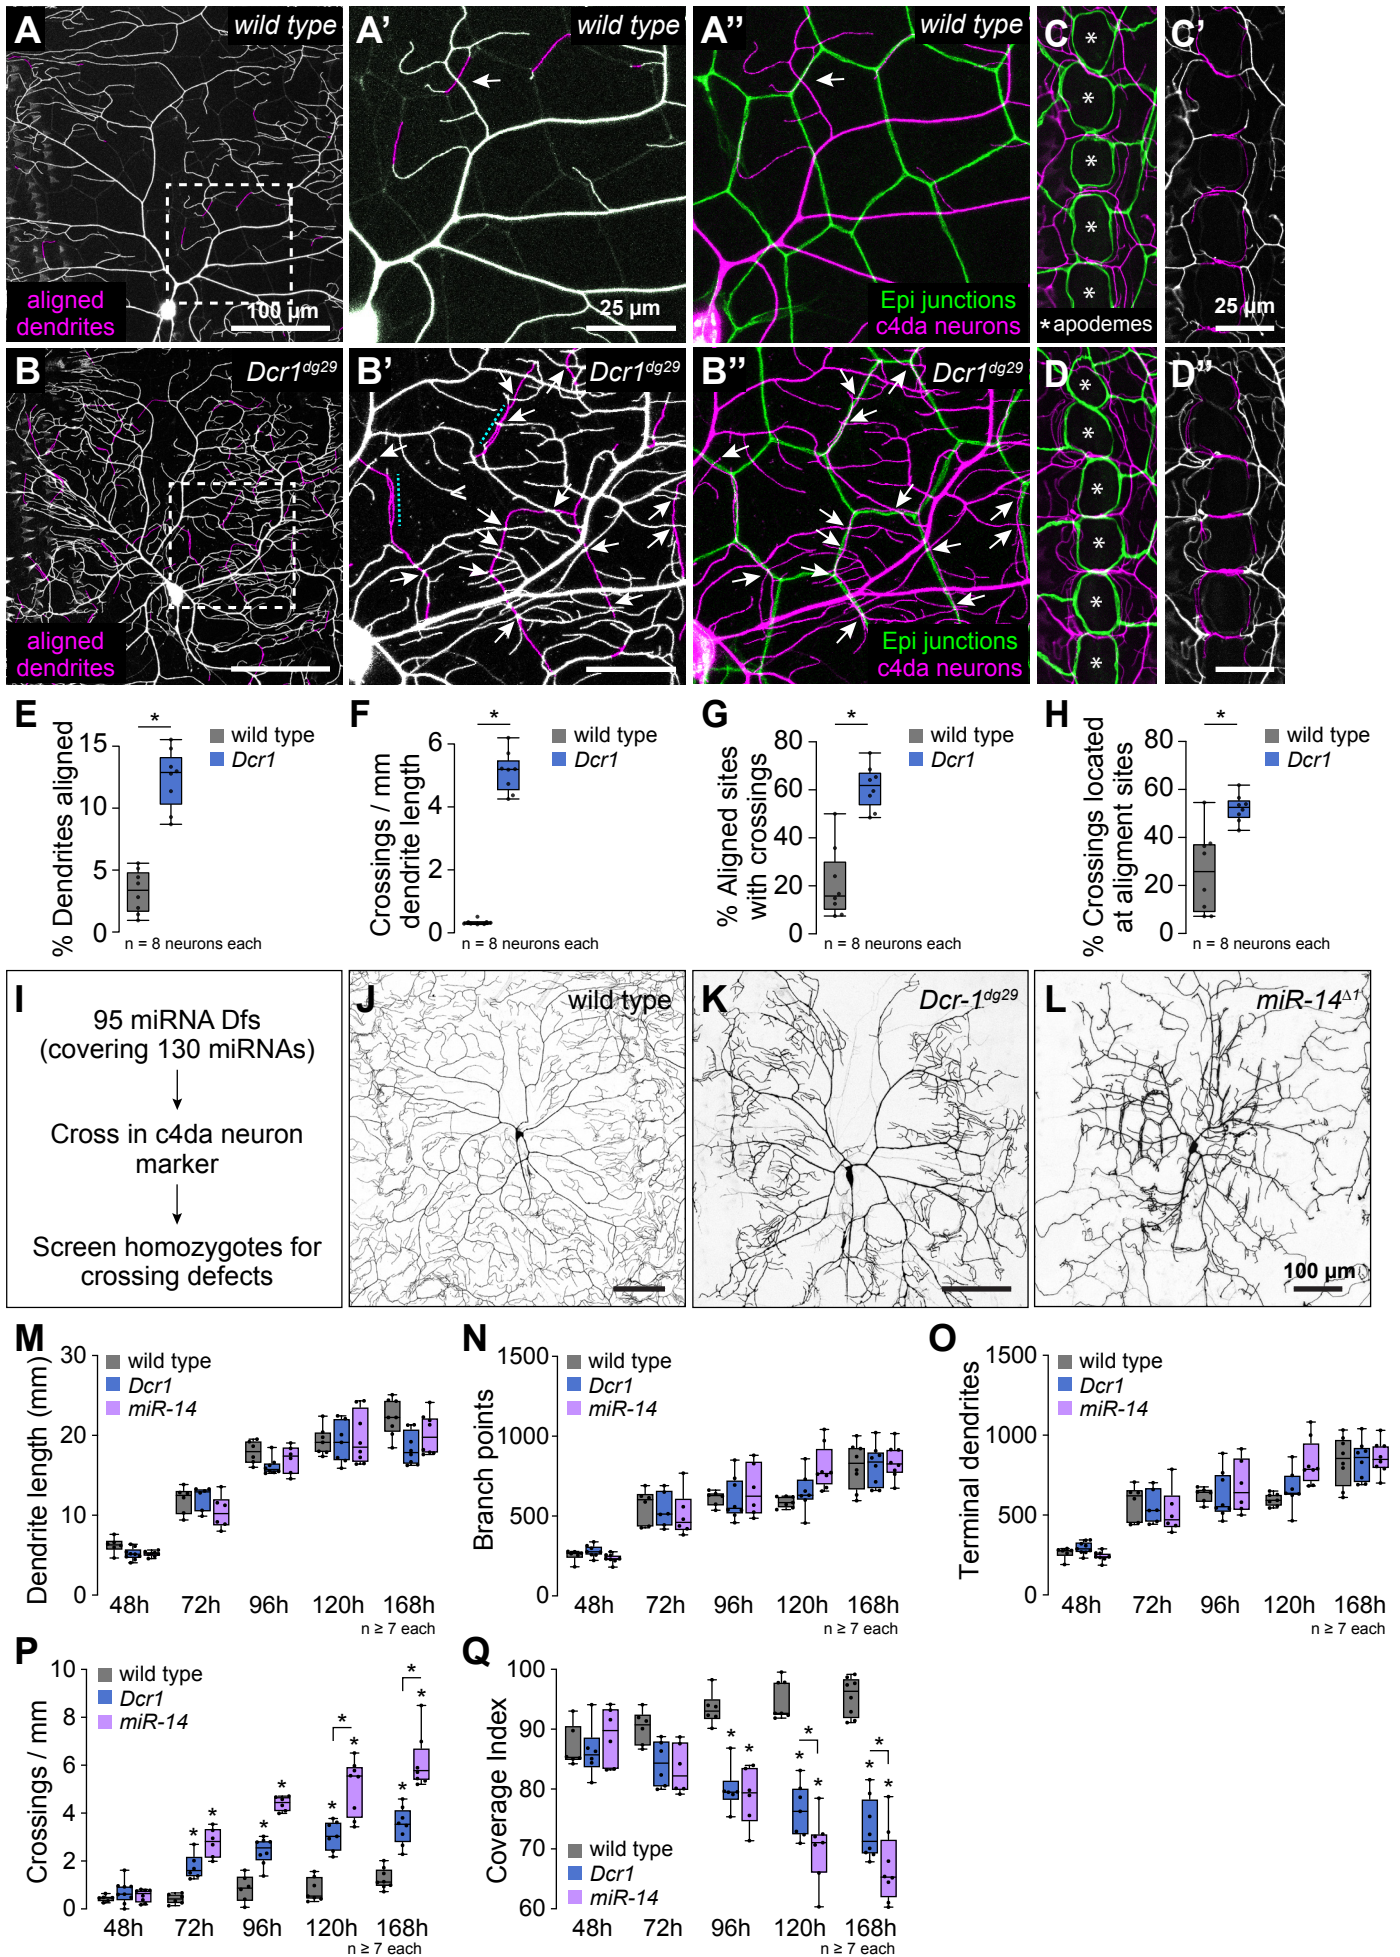

Luedke et al, Figure 1 - figure supplement 2

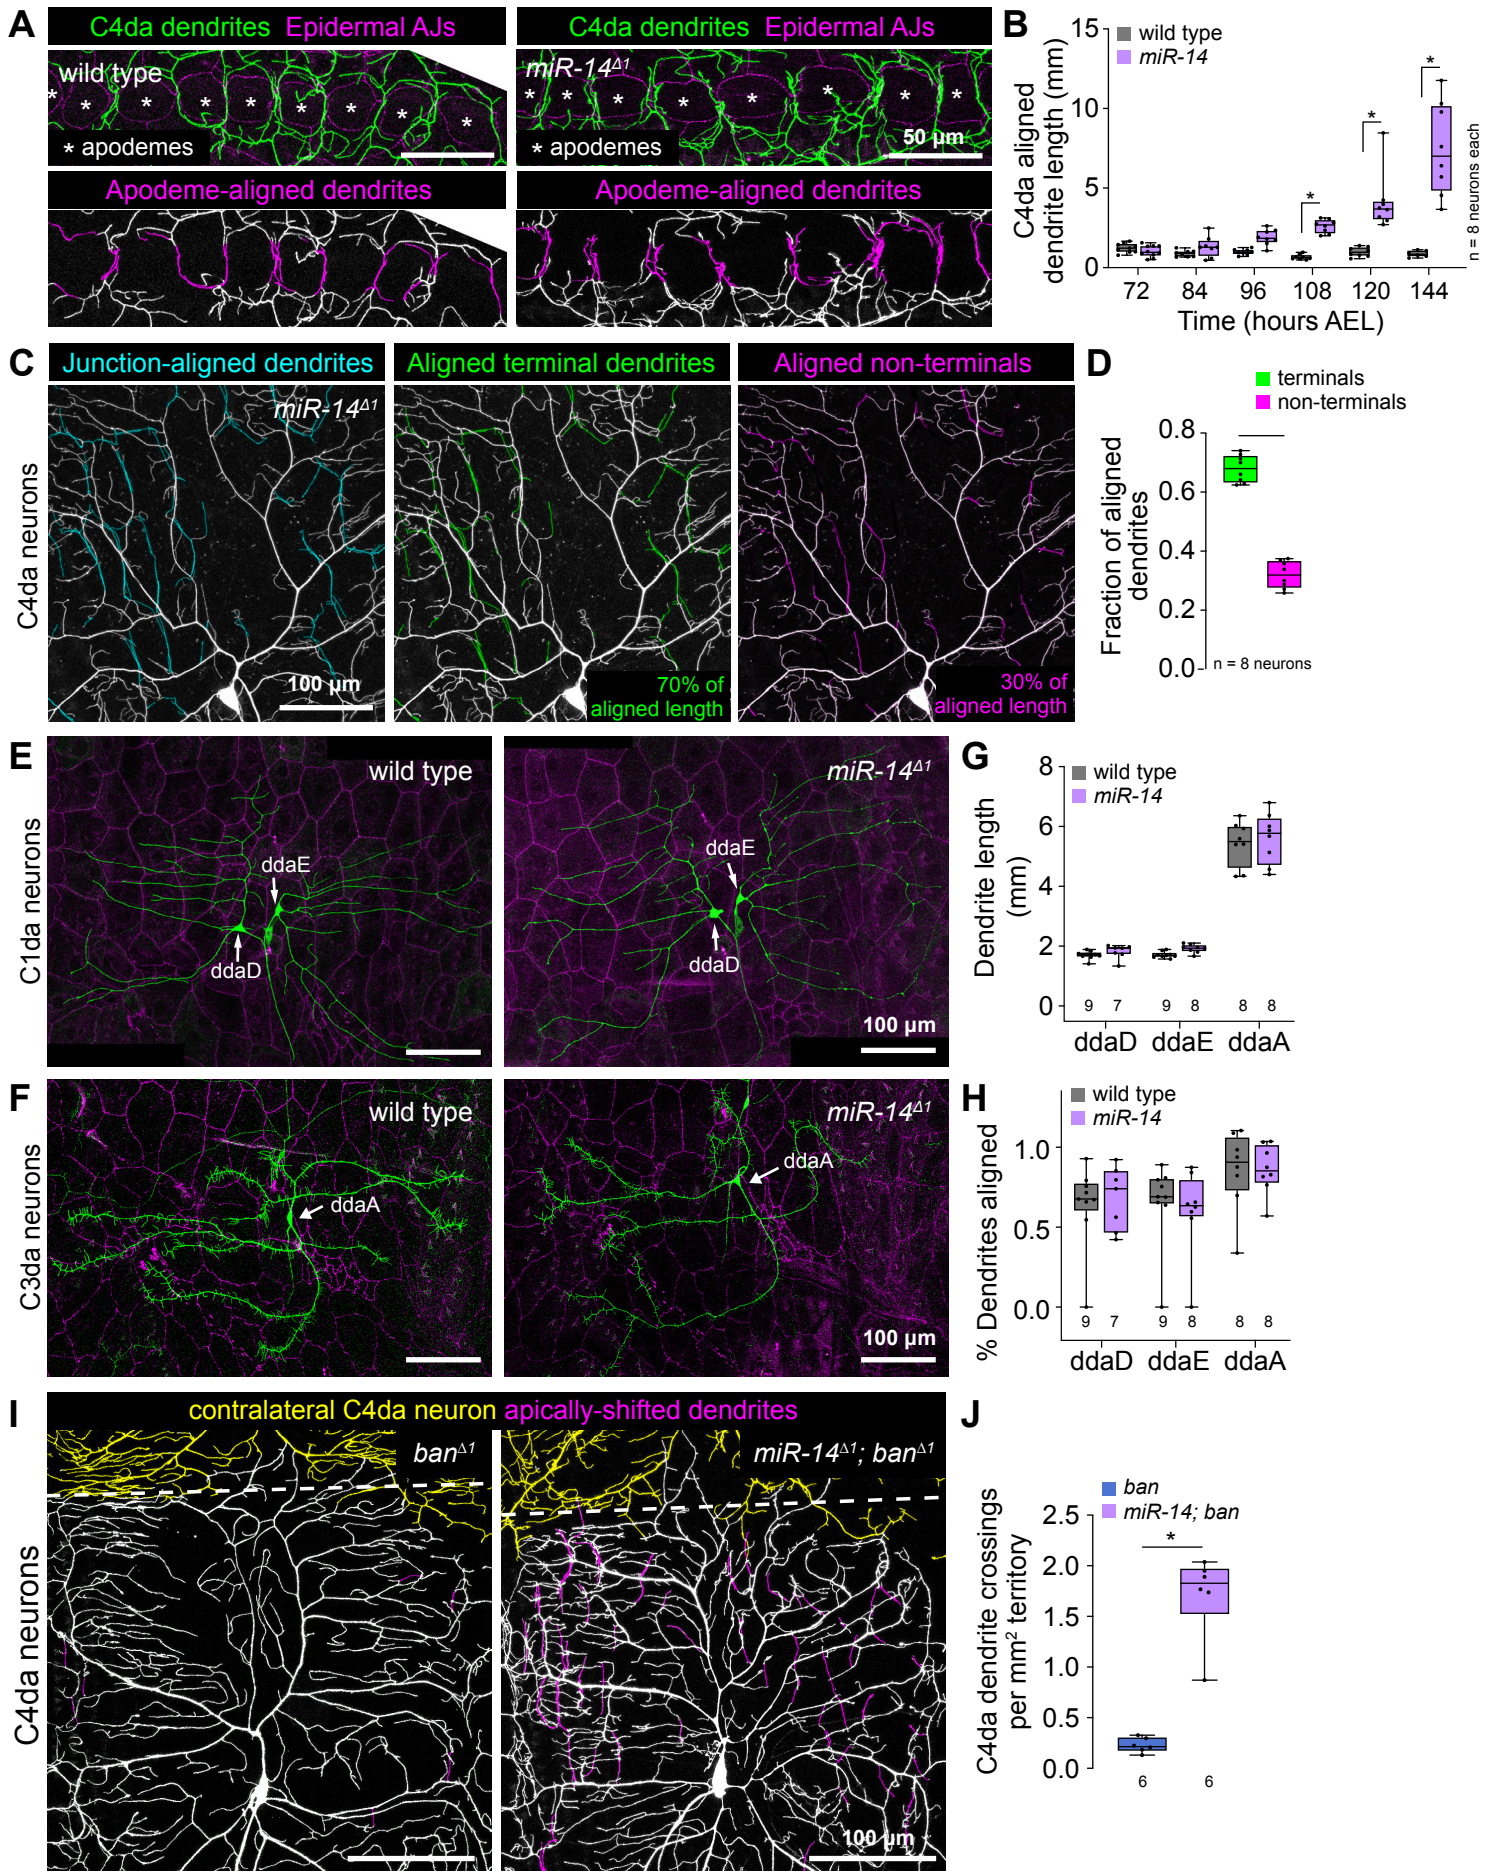

Luedke et al, Figure 2 - figure supplement 1

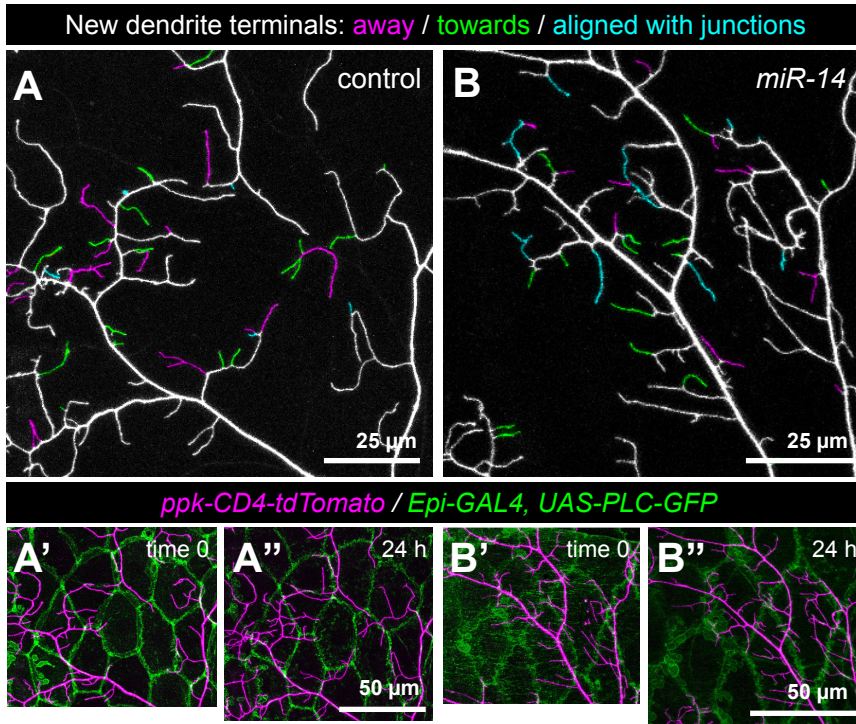

# Luedke et al, Figure 4 - figure supplement 1

## miR-14-GAL4 rescue activity

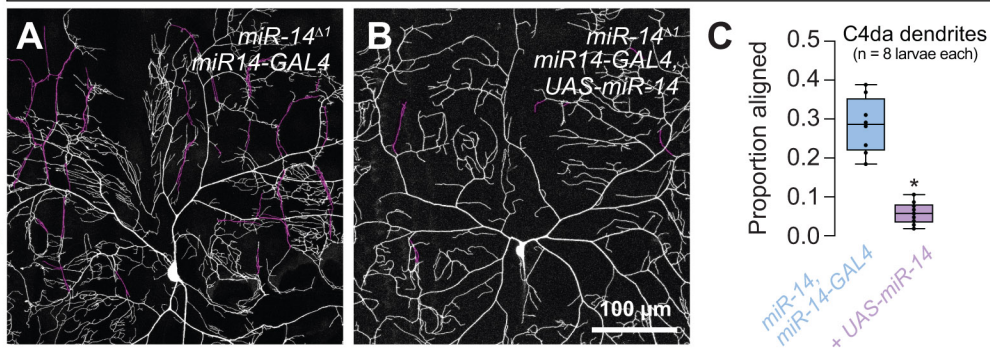

## Mosaic analysis: C4da MARCM clones

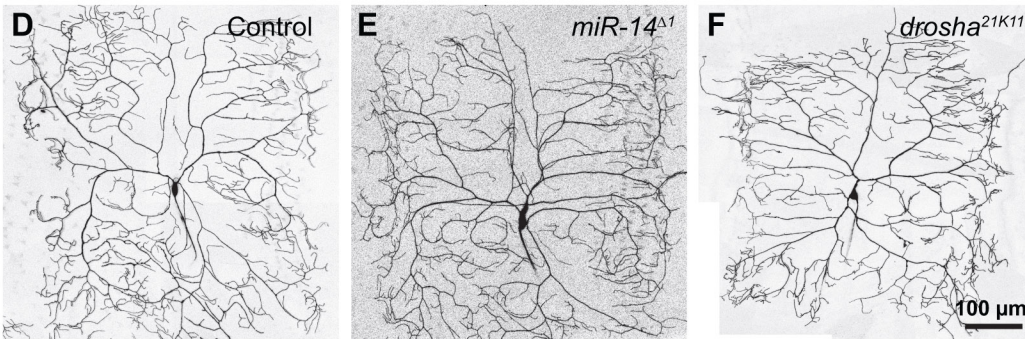

## Mosaic analysis: knockdown and rescue assays

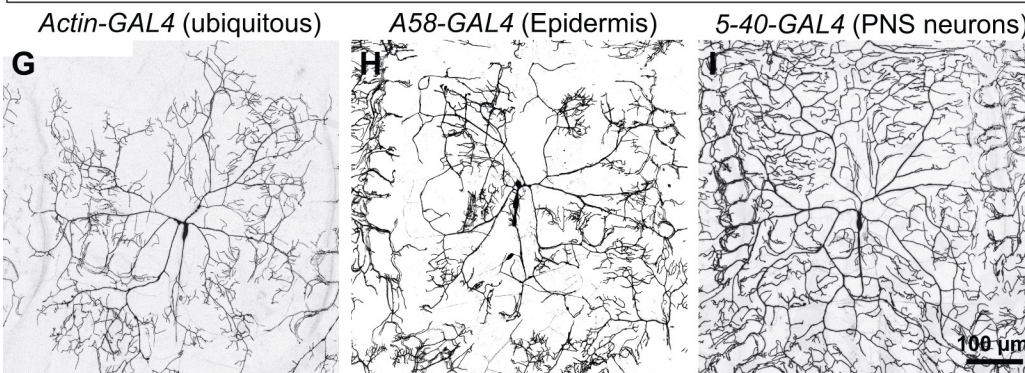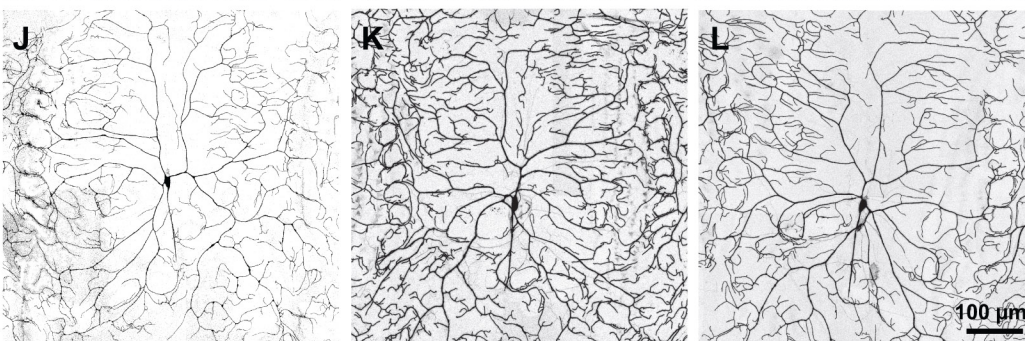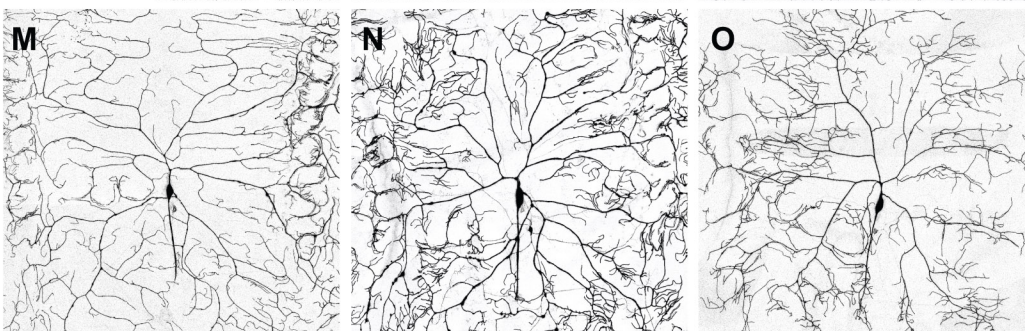

Luedke et al, Figure 5 - figure supplement 1

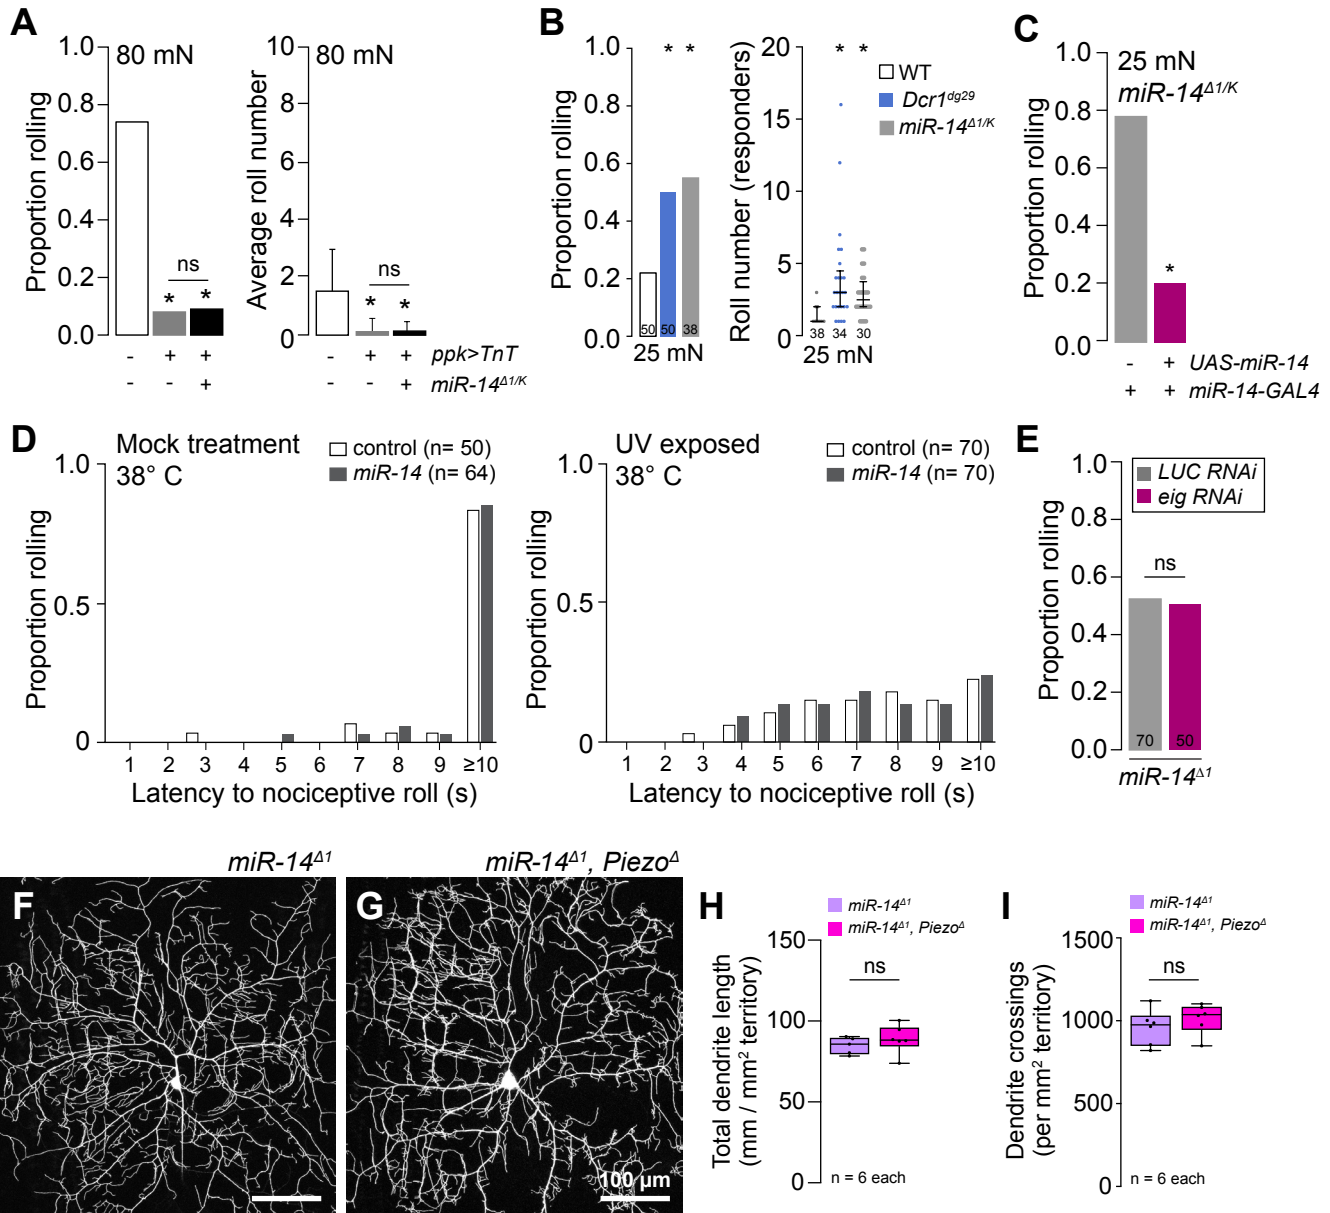

Luedke et al, Figure 6 - figure supplement 1

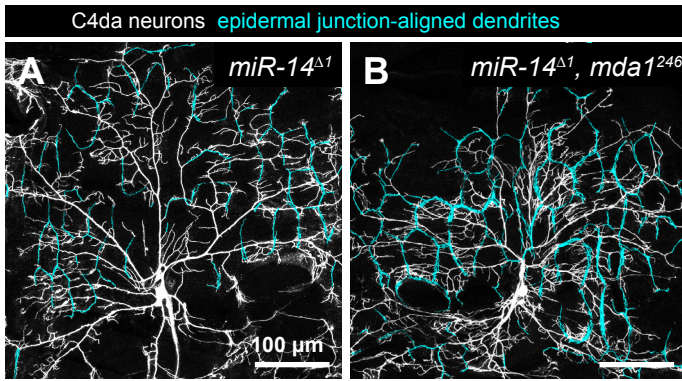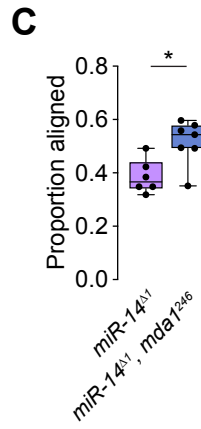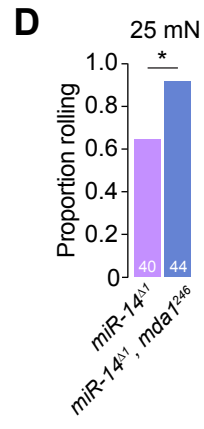

Luedke et al, Figure 7 - figure supplement 1

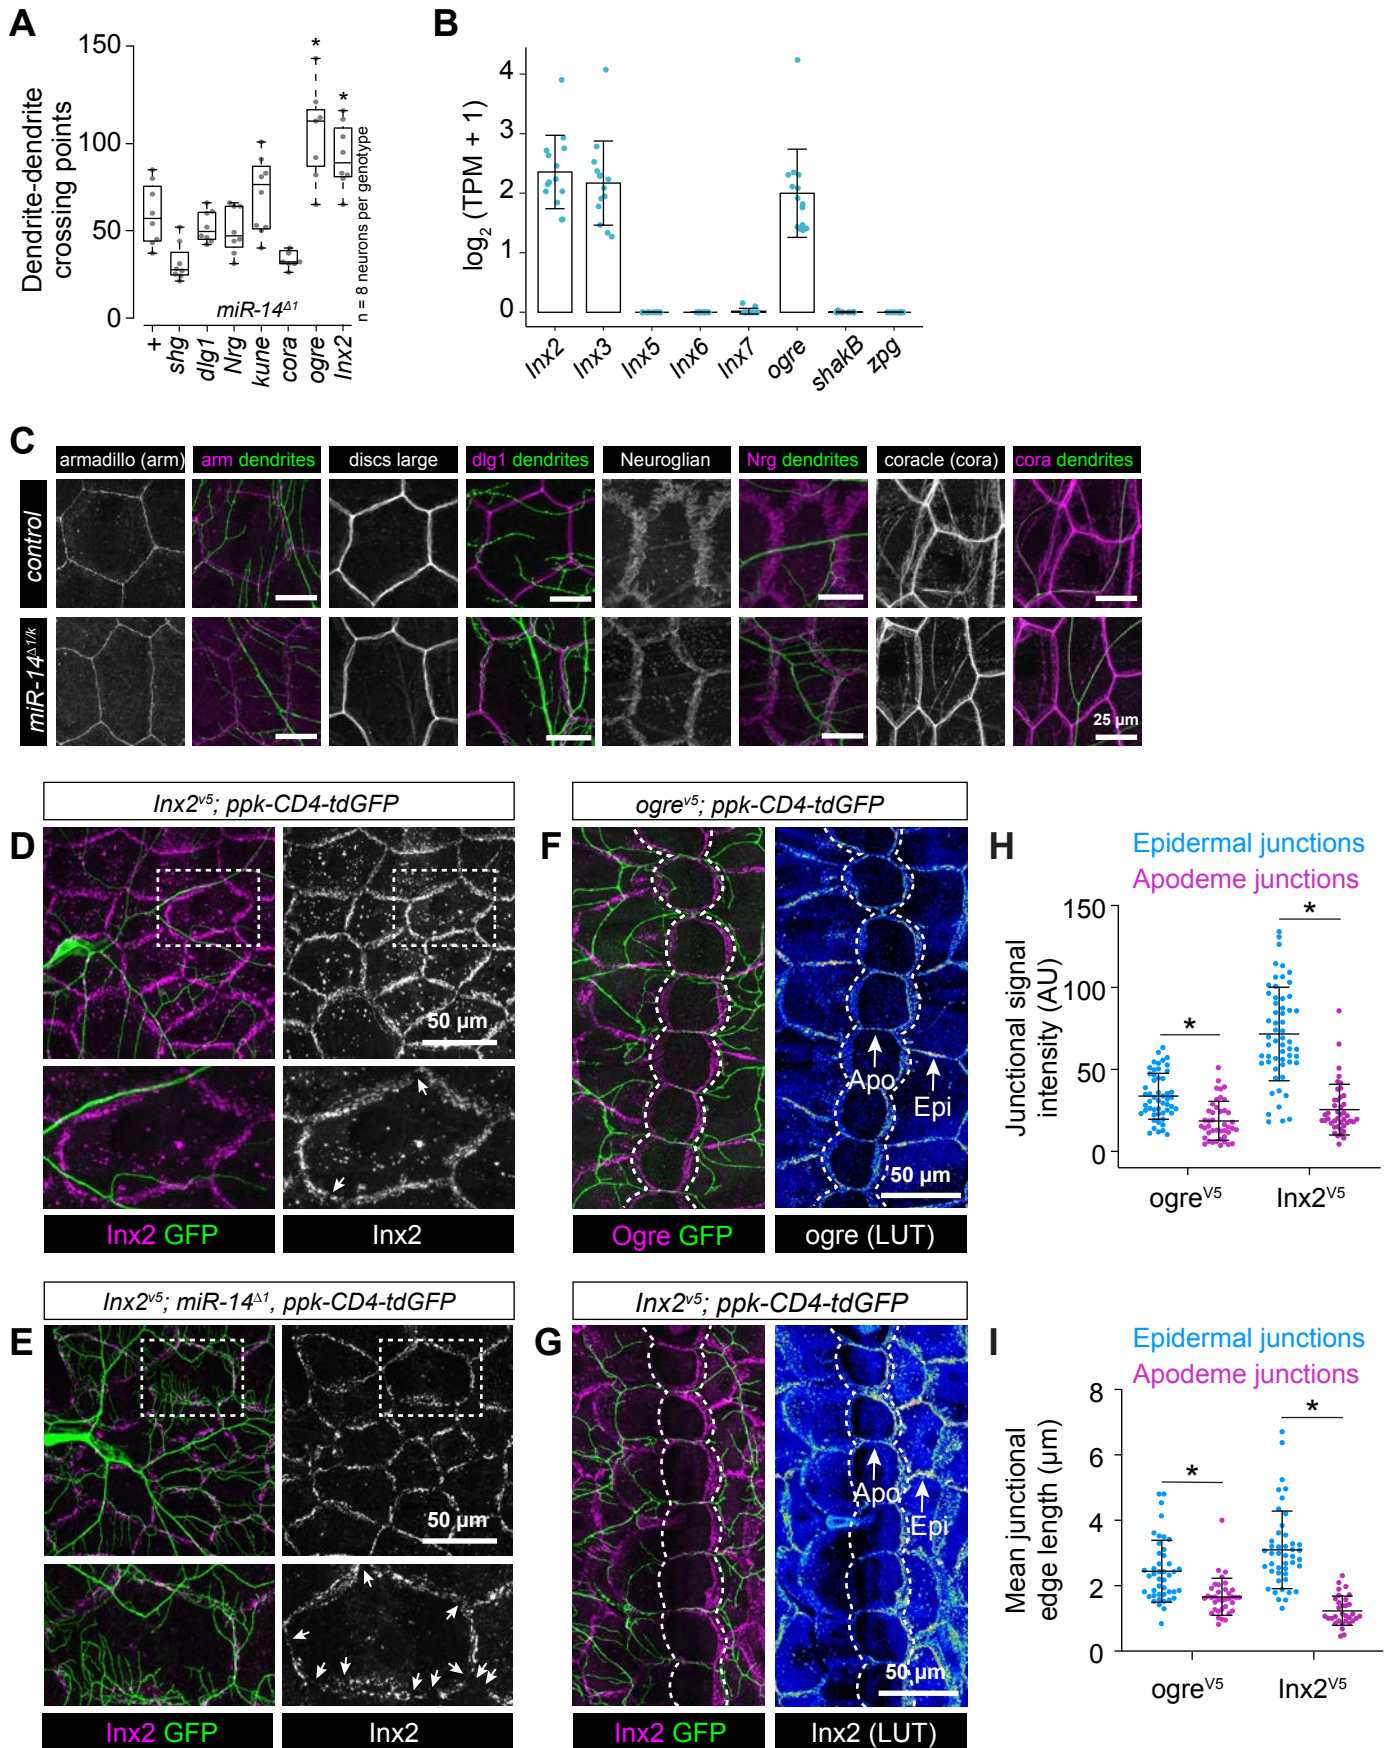

Luedke et al, Figure 7 - figure supplement 2

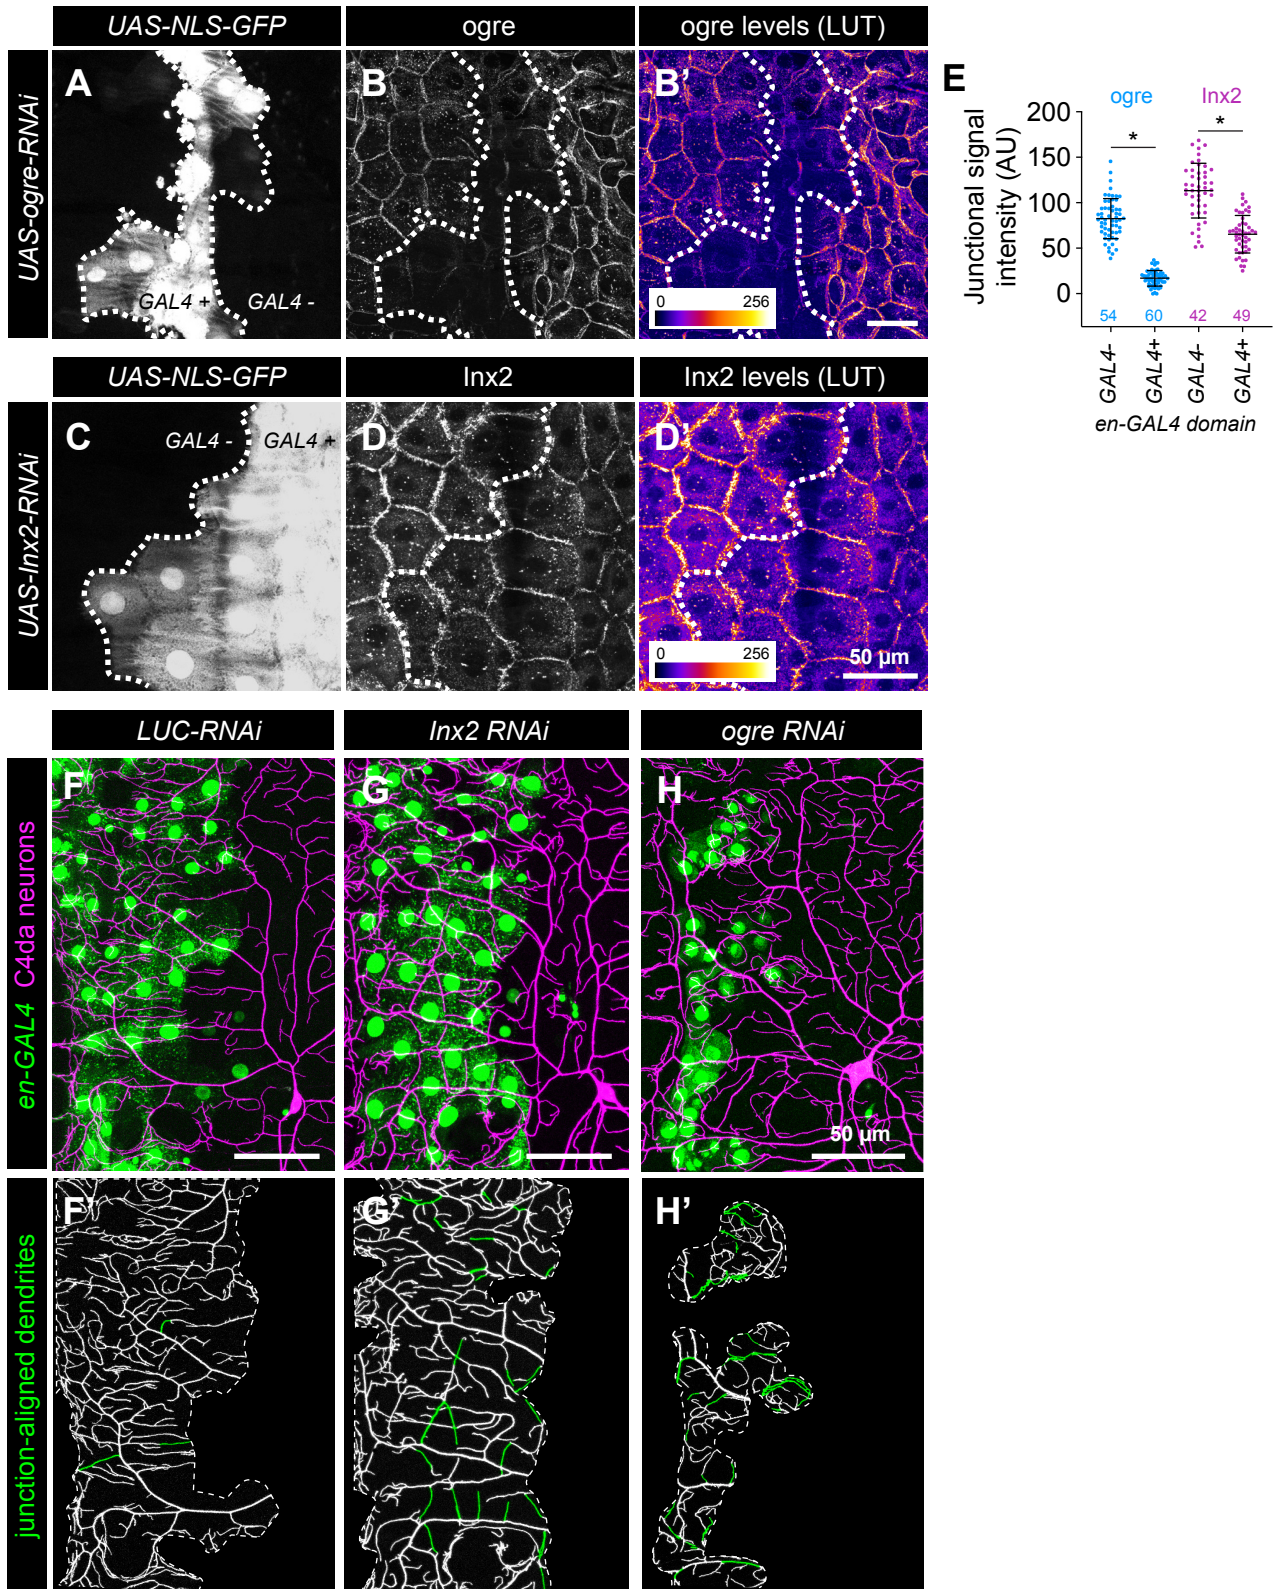



**Table S1. Alleles used in this study**

| <b>Allele</b>               | <b>Uses / Features</b>                         | <b>Identifier (RRID)</b> |
|-----------------------------|------------------------------------------------|--------------------------|
| 5-40-GAL4                   | GAL4 driver (PNS neurons)                      | Flybase_FBal0221791      |
| 98b-GAL4                    | GAL4 driver (C1da neurons)                     | Flybase_FBal0305321      |
| Act5C-GAL4                  | GAL4 driver (ubiquitous)                       | BDSC_3954                |
| A58-GAL4                    | GAL4 driver (epidermis)                        | Flybase_FBal0181674      |
| en2.4-GAL4                  | GAL4 driver (epidermis)                        | BDSC_30564               |
| miR-14-GAL4                 | GAL4 driver ( <i>miR-14</i> expression domain) | This study               |
| NompC-GAL4                  | GAL4 driver (C3da neurons)                     | BDSC_36361               |
| ppk-GAL4                    | GAL4 driver (C4da neurons)                     | BDSC_32079               |
| R38F11-GAL4                 | GAL4 driver (epidermis)                        | BDSC_50014               |
| sr-GAL4                     | GAL4 driver (apodemes)                         | BDSC_26663               |
| ppk-LexA                    | LexA driver (C4da neurons)                     | Flybase_FBal0336342      |
| UAS-mCherry.scramble.sponge | Knockdown (control miRNA sponge)               | BDSC_61501               |
| UAS-mCherry.miR-14.sponge   | Knockdown ( <i>miR-14</i> sponge)              | BDSC_61382               |
| UAS-eiger <sup>IR</sup>     | Knockdown ( <i>eiger</i> RNAi line)            | BDSC_58993               |
| UAS-Inx2RNAi                | Knockdown ( <i>Inx2</i> RNAi line)             | BDSC_42645               |
| UAS-LUC                     | Knockdown ( <i>Luciferase</i> RNAi line)       | BDSC_31603               |
| UAS-ogreRNAi                | Knockdown ( <i>ogre</i> RNAi line)             | BDSC_44048               |
| FRT42D                      | MARCM reagent                                  | BDSC_1802                |
| SOP-FLP                     | MARCM reagent                                  | Flybase_FBal0278148      |
| Tub-GAL80                   | MARCM reagent                                  | BDSC_9917                |
| ban <sup>Δ1</sup>           | Mutant allele                                  | BDSC_58878               |
| cora <sup>5</sup>           | Mutant allele                                  | BDSC_52233               |
| Dcr1 <sup>mn29</sup>        | Mutant allele                                  | This study               |
| dlg1 <sup>A</sup>           | Mutant allele                                  | BDSC_57086               |
| Drosha <sup>21K11</sup>     | Mutant allele                                  | Flybase_FBal0268190      |
| inx2 <sup>G0118</sup>       | Mutant allele                                  | BDSC_11826               |
| kune <sup>C309</sup>        | Mutant allele                                  | BDSC_16333               |
| mdi1 <sup>242</sup>         | Mutant allele                                  | This study               |
| mdi2 <sup>246</sup>         | Mutant allele                                  | This study               |
| mdi3 <sup>442</sup>         | Mutant allele                                  | This study               |
| mdi4 <sup>51</sup>          | Mutant allele                                  | This study               |
| miR-14 <sup>Δ1</sup>        | Mutant allele                                  | BDSC_33067               |
| miR-14 <sup>k10213</sup>    | Mutant allele                                  | BDSC_10982               |
| nan <sup>GAL4</sup>         | Mutant allele                                  | BDSC_68205               |
| NompC <sup>1</sup>          | Mutant allele                                  | BDSC_42260               |
| NompC <sup>3</sup>          | Mutant allele                                  | BDSC_42258               |
| Nrg <sup>14</sup>           | Mutant allele                                  | BDSC_5708                |
| ogre <sup>1</sup>           | Mutant allele                                  | Flybase_FBal0013231      |
| pain <sup>1</sup>           | Mutant allele                                  | BDSC_27895               |
| piezo <sup>KO</sup>         | Mutant allele                                  | BDSC_58770               |
| ppk <sup>ESB</sup>          | Mutant allele                                  | BDSC_79622               |
| shg <sup>2</sup>            | Mutant allele                                  | BDSC_3085                |
| Tig <sup>A1</sup>           | Mutant allele                                  | BDSC_8795                |
| Tig <sup>x</sup>            | Mutant allele                                  | BDSC_8796                |
| TrpA1 <sup>1</sup>          | Mutant allele                                  | BDSC_26263               |
| UAS-if                      | Overexpression/rescue construct                | Flybase_FBal0062798      |
| UAS-Inx2.Sb                 | Overexpression/rescue construct                | Flybase_FBal0338197      |
| UAS-LUC-miR-14.T            | Overexpression/rescue construct                | BDSC_41178               |
| UAS-mew                     | Overexpression/rescue construct                | Flybase_FBal0062567      |
| UAS-ogre.S                  | Overexpression/rescue construct                | Flybase_FBal0338192      |
| UAS-TNT                     | Overexpression/rescue construct                | BDSC_28997               |
| inx2 <sup>V5</sup>          | Reporter (V5-tagged Inx2)                      | Flybase_FBal0345156      |
| ogre <sup>V5</sup>          | Reporter (V5-tagged Ogre)                      | Flybase_FBal0345155      |
| Nrg167GFP                   | Reporter (epidermal septate junctions)         | BDSC_6844                |

|                                       |                                         |                     |
|---------------------------------------|-----------------------------------------|---------------------|
| <i>Nrx-IV-GFP</i>                     | Reporter (epidermal septate junctions)  | BDSC_50798          |
| <i>ppk-CD4-tdGFP<sup>1b</sup></i>     | Reporter (C4da neurons)                 | BDSC_35842          |
| <i>ppk-CD4-tdTomato<sup>10A</sup></i> | Reporter (C4da neurons)                 | BDSC_35845          |
| <i>shg<sup>mCherry</sup></i>          | Reporter (epidermal adherens junctions) | BDSC_59014          |
| <i>trol-GFP</i>                       | Reporter (epidermal BM)                 | Flybase_FBal0243610 |
| <i>Tub-GFP</i>                        | Reporter (control miRNA sensor)         | FBtp0017439         |
| <i>Tub-GFP.mir-14</i>                 | Reporter ( <i>mir-14</i> sensor)        | FBtp0056974         |
| <i>UAS-CD4-tdGFP</i>                  | Reporter (membrane-targeted GFP)        | BDSC_35839          |
| <i>UAS-GCaMP6s</i>                    | Reporter (calcium imaging)              | BDSC_42749          |
| <i>AOP-GCaMP6s</i>                    | Reporter (calcium imaging)              | BDSC_44273          |
| <i>UAS-Gerry</i>                      | Reporter (ratiometric calcium imaging)  | BDSC_80141          |
| <i>UAS-mCD8-GFP</i>                   | Reporter (membrane-targeted GFP)        | BDSC_5137           |
| <i>UAS-NLS-GFP</i>                    | Reporter (nuclear-targeted GFP)         | BDSC_4776           |
| <i>UAS-PLC<sup>δ</sup>-PH-GFP</i>     | Reporter (PIP2 reporter)                | BDSC_39693          |
| <i>UAS-RedStinger<sup>4</sup></i>     | Reporter (NLS-RFP)                      | BDSC_8546           |
| <i>UAS-tdTomato</i>                   | Reporter (RFP)                          | BDSC_36328          |
